# Supplementary figures and images for: The rotational dynamics of H2 adsorbed in covalent organic frameworks
Source: Royal Society of Chemistry journal article supplement (doi:10.1039/c7cp00924k), 2017-01-01

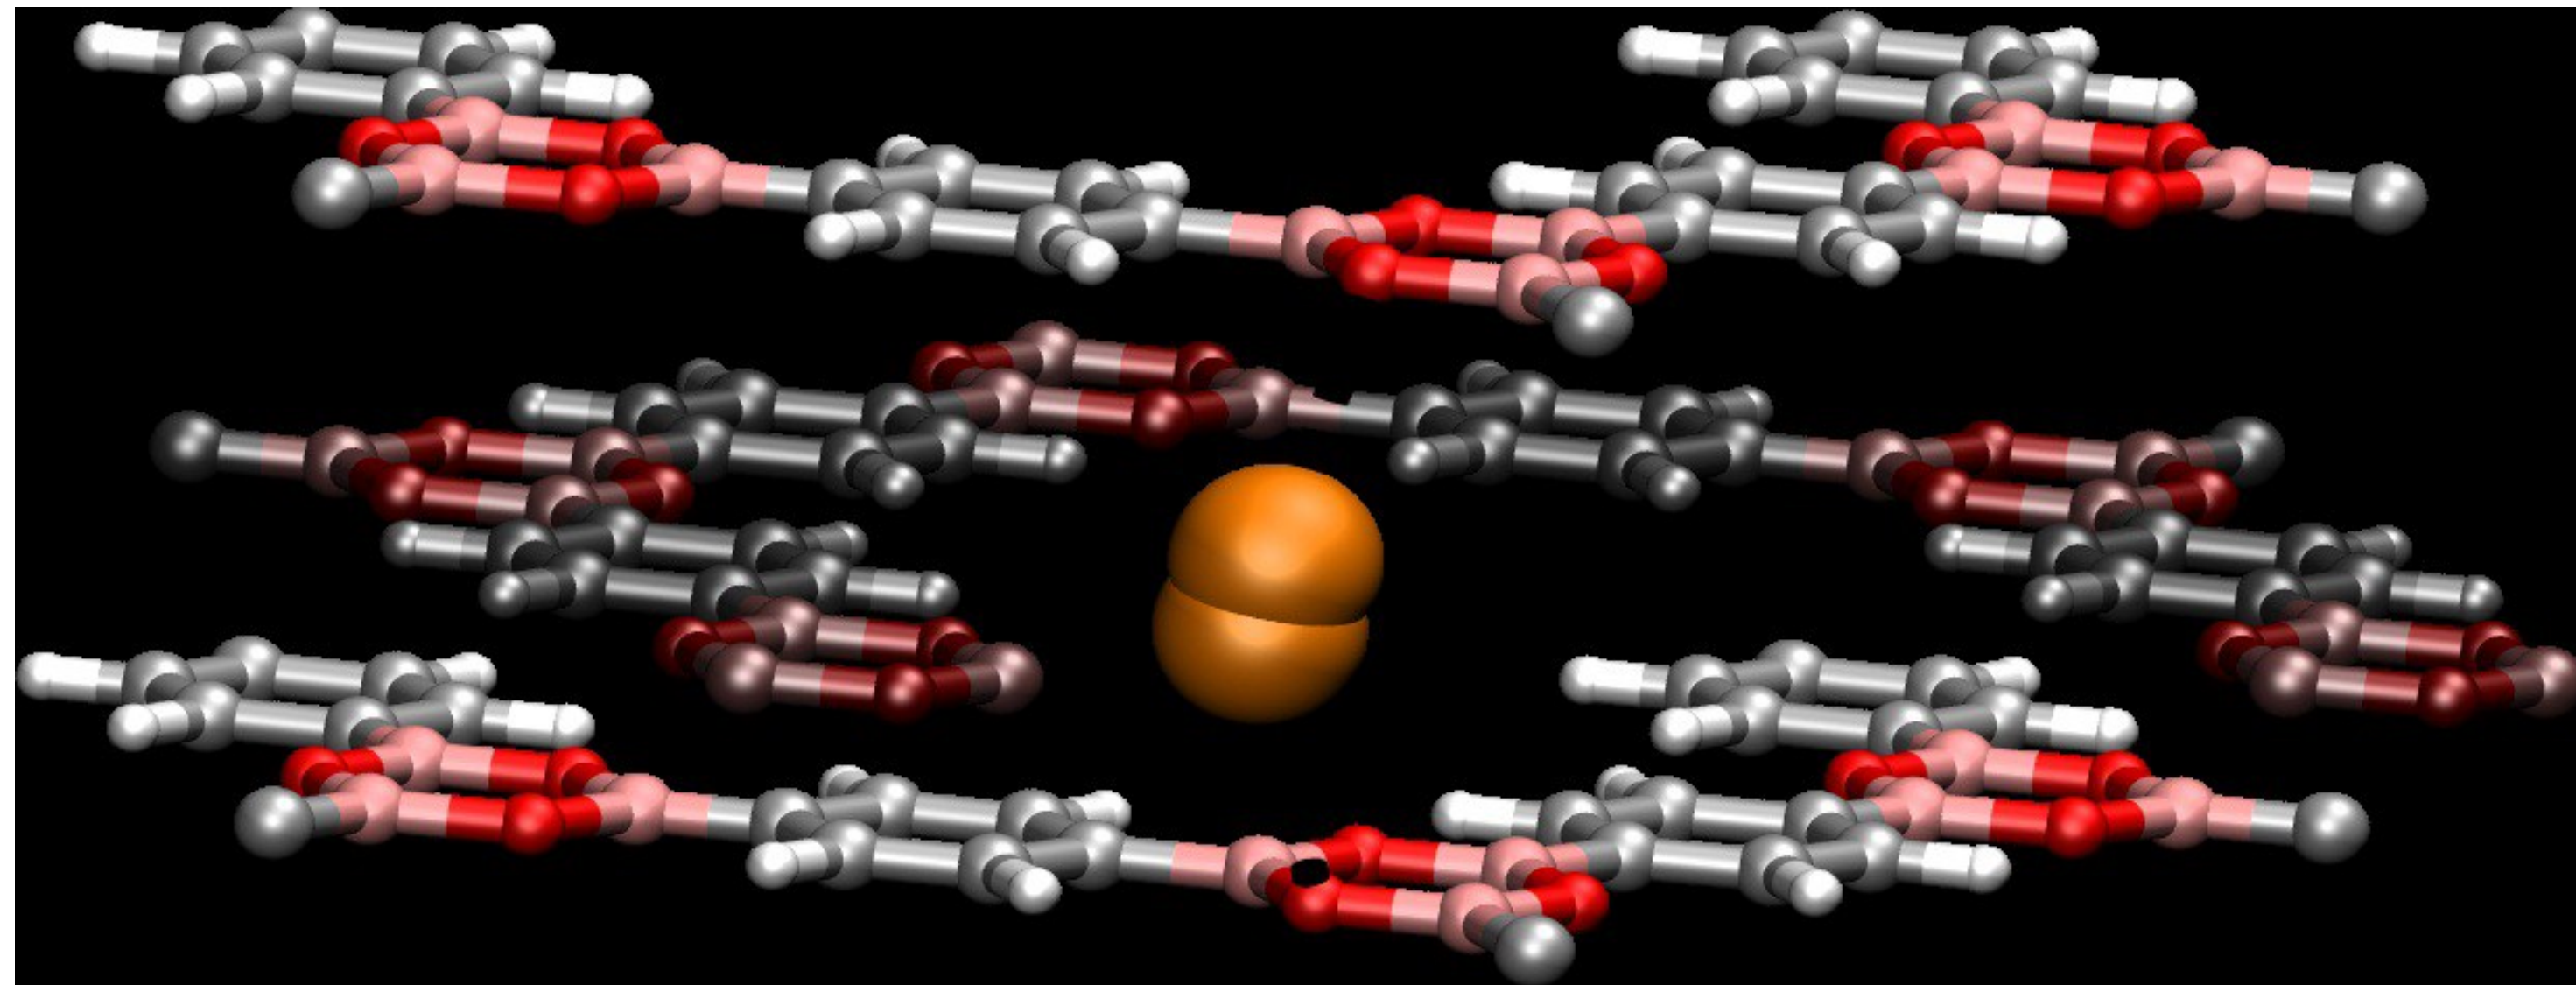

Supplement: c7cp00924k2.pdf [file c7cp00924k2.pdf]
